# Supplementary material for: Neural Correlates of Mentalizing Altered in Childhood Trauma and Cocaine Use Disorder
Source: Research Square preprint supplement (doi:10.21203/rs.3.rs-8407565/v1), 2026-01-09
Supplement: Supplementary file 1 [file 3b6b5b384d02cd6c85a741da.docx]

**Supplemental information**

| **Demographics** | **HC-low** (n = 18) | **HC-high** (n = 16) | **iCUD-low** (n = 22) | **iCUD-high** (n = 23) | **Excluded  (n = 15)** | **comparison** |
| --- | --- | --- | --- | --- | --- | --- |
| Age | 44.4 (9.9) | 45.78 (10) | 46.63 (10.9) | 45.19 (9.1) | 49.36 (7.9) | n.s. |
| Sex (F/M) | 10/8 | 10/6 | 5/17 | 5/18 | 3/12 | +p < .05 |
| Race (aa/white/other) | 12/4/2 | 7/7/2 | 9/9/4 | 15/8/0 | 9/5/1 | +n.s. |
| Education (years) | 15.44 (2.3) | 14.63 (2.1) | 13.16 (1.3) | 13.54 (2.1) | 13.66 (2.4) | p < .01 |
| Verbal cog. perf. | 105.11 (10) | 105.06 (10.6) | 104 (10.7) | 106.91 (8.5) | 103.93 (9.2) | n.s. |
| Nonverbal cog. perf. | 11.72 (2.3) | 10.63 (2.4) | 9.77 (2.9) | 11.35 (2.3) | 10.13 (3.5) | n.s. |

**Table S1.** Demographics characteristics including the group of participants excluded due to performance; HC-low = healthy controls with low trauma, HC-high = healthy controls with high trauma, iCUD-low = individuals with cocaine use disorder and low trauma, iCUD-high = individuals with cocaine use disorder and high trauma, Excluded = excluded participants (i.e., 7 iCUD and 8 HC). + indicates a Chi-square test and unmarked values represent results from an ANOVA.
